# Supplementary material for: Optimised recovery of lignin-derived phenols in a Scottish fjord by the CuO oxidation method
Source: Royal Society of Chemistry journal article supplement (doi:10.1039/b808970a), 2008-01-01
Supplement: b808970a.pdf [file b808970a.pdf]

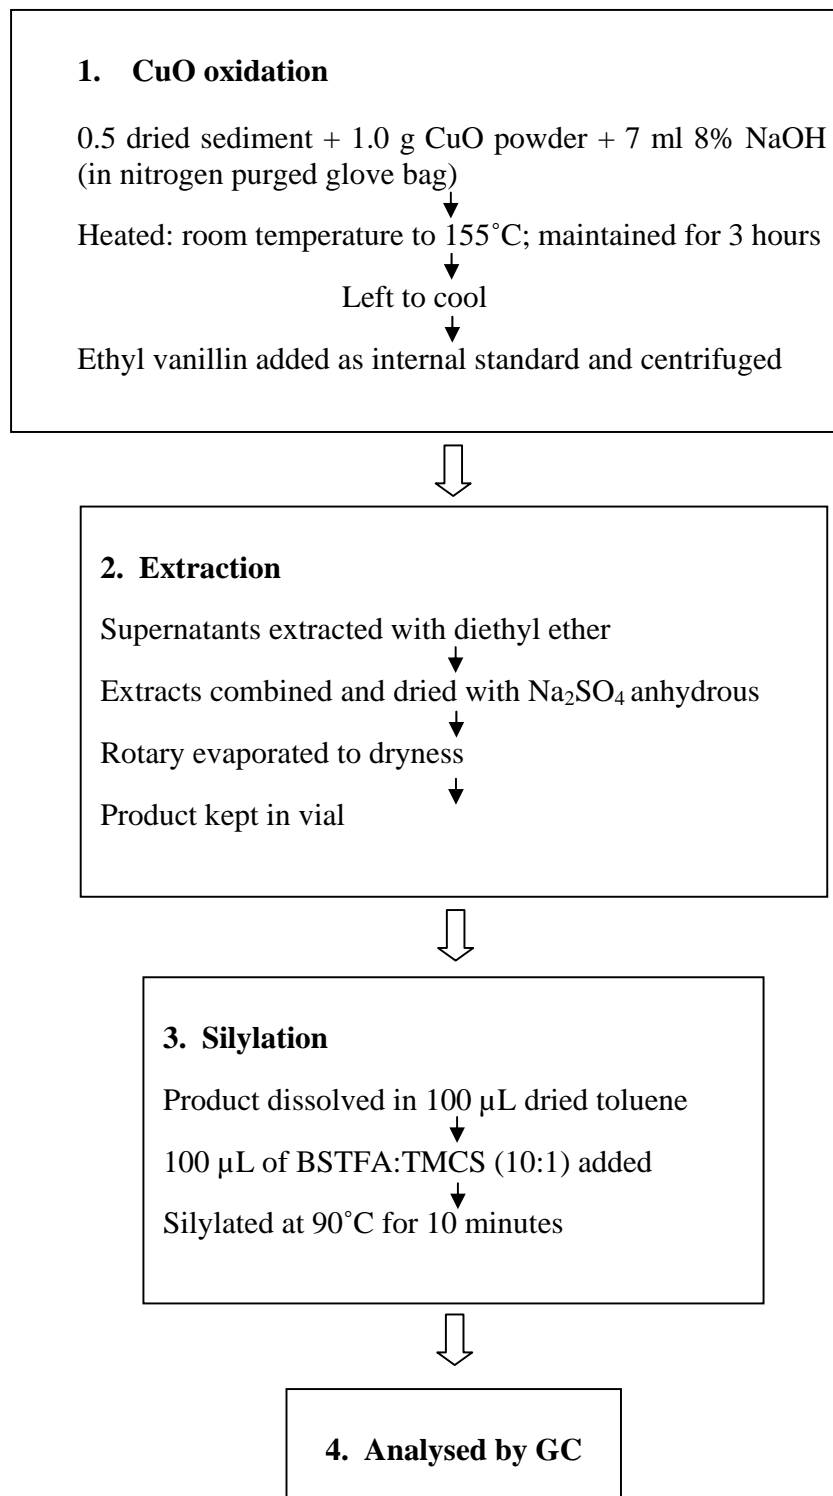

**Supplementary Information Fig. 1** Flow diagram summarizing the analytical protocol.

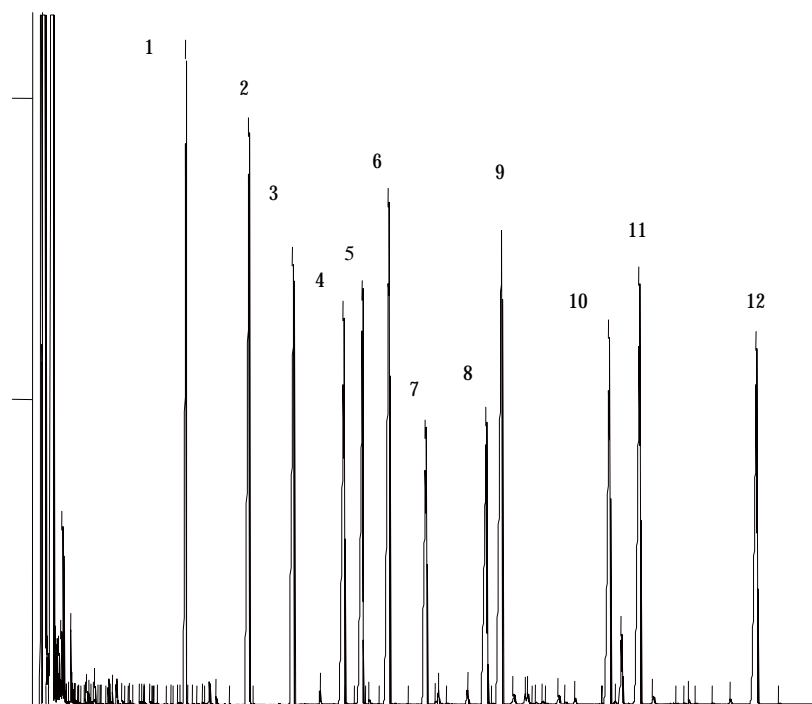

**Supplementary Information Fig. 2** The 12 Me<sub>3</sub>Si-silylated phenols of the standard mixtures was analysed using the gas chromatograph with flame ionization detector (GC-FID). Peaks of each lignin phenol are numbered according to their elution times: 1) p-hydroxybenzaldehyde; 2) p-hydroxyacetophenone; 3) vanillin; 4) ethyl vanillin; 5) acetovanillone; 6) p-hydroxybenzoic acid; 7) syringaldehyde; 8) acetosyringone; 9) vanillic acid; 10) syringic acid; 11) p-coumaric acid; 12) ferulic acid.

**Supplementary Information Table 1** Concentrations of lignin-derived phenols under different oxidation conditions

| No | Lignin   | Concentrations of lignin phenol detected from different CuO oxidation programs (mg/g) |      |           |              |      |           |              |       |            |              |      |           |
|----|----------|---------------------------------------------------------------------------------------|------|-----------|--------------|------|-----------|--------------|-------|------------|--------------|------|-----------|
|    |          | 170°C, 2 hrs                                                                          |      |           | 170°C, 3 hrs |      |           | 155°C, 2 hrs |       |            | 155°C, 3 hrs |      |           |
|    |          | 1                                                                                     | 2    | Mean      | 1            | 2    | mean      | 1            | 2     | mean       | 1            | 2    | Mean      |
| 1  | p-hb     | 0.05                                                                                  | 0.04 | 0.05±0.01 | 0.04         | 0.10 | 0.07±0.04 | 0.38         | 0.43  | 0.41±0.04  | 0.50         | 0.48 | 0.49±0.01 |
| 2  | p-ha     | 0.37                                                                                  | 0.26 | 0.32±0.08 | 0.31         | 0.86 | 0.59±0.39 | 0.39         | 0.48  | 0.44±0.06  | 0.43         | 0.40 | 0.42±0.02 |
| 3  | Van      | 0.25                                                                                  | 0.18 | 0.22±0.05 | 0.31         | 1.30 | 0.81±0.70 | 0.65         | 0.60  | 0.63±0.04  | 0.51         | 0.43 | 0.47±0.06 |
| 4  | EV       | 0.22                                                                                  | 0.22 | 0.22±0.00 | 0.22         | 0.22 | 0.22±0.00 | 0.23         | 0.23  | 0.23±0.00  | 0.22         | 0.22 | 0.22±0.00 |
| 5  | Acetovan | 0.30                                                                                  | 0.25 | 0.28±0.04 | 0.40         | 0.60 | 0.50±0.14 | 0.39         | 0.49  | 0.44±0.07  | 0.43         | 0.41 | 0.42±0.01 |
| 6  | p-hba    | 1.38                                                                                  | 1.62 | 1.50±0.17 | 5.05         | 6.10 | 5.58±0.74 | 0.45         | 0.56  | 0.51±0.08  | 0.55         | 0.53 | 0.54±0.01 |
| 7  | Syrin    | 0.30                                                                                  | 0.17 | 0.24±0.09 | 0.03         | 0.06 | 0.05±0.02 | 0.84         | 0.60  | 0.72±0.17  | 1.57         | 1.50 | 1.54±0.05 |
| 8  | Acetosyr | 0.35                                                                                  | 0.29 | 0.32±0.04 | 0.49         | 0.38 | 0.44±0.08 | 0.67         | 0.84  | 0.76±0.12  | 0.64         | 0.73 | 0.69±0.06 |
| 9  | Va       | 1.62                                                                                  | 1.39 | 1.51±0.16 | 4.02         | 9.98 | 7.00±4.21 | 0.58         | 0.72  | 0.65±0.10  | 0.89         | 0.88 | 0.89±0.01 |
| 10 | Sa       | 2.26                                                                                  | 1.93 | 2.10±0.23 | 5.22         | 9.48 | 7.35±3.01 | 0.99         | 1.16  | 1.08±0.12  | 1.01         | 1.23 | 1.12±0.16 |
| 11 | p-cou    | 6.64                                                                                  | 5.15 | 5.90±1.05 | 4.38         | 0.81 | 2.60±2.52 | 9.20         | 12.76 | 10.98±2.52 | 6.48         | 7.62 | 7.05±0.81 |
| 12 | Fe       | 0.88                                                                                  | 0.68 | 0.78±0.14 | 0.70         | 0.35 | 0.53±0.25 | 1.44         | 1.98  | 1.71±0.38  | 1.00         | 1.40 | 1.20±0.28 |

Abbreviations: p-hb, p-hydroxybenzaldehyde; p-ha, p-hydroxyacetophenone; Van, vanillin; EV, ethyl vanillin; Acetovan, acetovanillone; p-hba, p-hydroxybenzoic acid; Syrin, syringaldehyde; Acetosyr, acetosyringone; Va, vanillic acid; Sa, syringic acid; p-Cou, p-coumaric acid; Fe, ferulic acid.

**Supplementary Information Table 2** Monthly concentrations of lignin-derived phenol parameters at different sampling locations in Loch Creran

## (a) Sediment trap

| Lignin parameters    | Sampling dates |        |        |        |        |        |        |        |        |        |         |          |          |
|----------------------|----------------|--------|--------|--------|--------|--------|--------|--------|--------|--------|---------|----------|----------|
|                      | 12.12.01       | 8.1.02 | 6.2.02 | 7.3.02 | 4.4.02 | 7.5.02 | 4.6.02 | 2.7.02 | 1.8.02 | 2.9.02 | 30.9.02 | 14.11.02 | 12.12.02 |
| P (mg/g)             | 0.0838         | 0.0804 | 0.1094 | 0.1049 | 0.2269 | 0.1685 | 0.0736 | 0.2350 | 0.0646 | 0.0783 | 0.1276  | 0.0811   | 0.0579   |
| V (mg/g)             | 0.1433         | 0.1468 | 0.1841 | 0.1857 | 0.1383 | 0.0605 | 0.0796 | 0.2050 | 0.0738 | 0.1131 | 0.1473  | 0.1371   | 0.0942   |
| S (mg/g)             | 0.0939         | 0.0967 | 0.1176 | 0.1232 | 0.0789 | 0.0974 | 0.0853 | 0.1006 | 0.0543 | 0.0837 | 0.0943  | 0.0987   | 0.0685   |
| C (mg/g)             | 0.0990         | 0.0917 | 0.1743 | 0.1494 | 0.0479 | 0.0273 | 0.0517 | 0.0604 | 0.0352 | 0.0659 | 0.1020  | 0.0824   | 0.0642   |
| Total lignin (mg/g)  | 0.3362         | 0.3352 | 0.4760 | 0.4583 | 0.2651 | 0.1852 | 0.2166 | 0.3660 | 0.1633 | 0.2627 | 0.3436  | 0.3182   | 0.2269   |
| S/V                  | 0.6553         | 0.6587 | 0.6388 | 0.6634 | 0.5705 | 1.6100 | 1.0716 | 0.4907 | 0.7358 | 0.7401 | 0.6402  | 0.7199   | 0.7272   |
| C/V                  | 0.6909         | 0.6247 | 0.9468 | 0.8045 | 0.3465 | 0.4512 | 0.6495 | 0.2946 | 0.4740 | 0.5827 | 0.6925  | 0.6010   | 0.3631   |
| (Ad/Al) <sub>v</sub> | 0.7555         | 0.9430 | 1.0132 | 1.0342 | 4.7459 | 1.1210 | 1.5059 | 7.6142 | 1.4564 | 1.1962 | 2.9852  | 1.4485   | 1.2796   |
| (Ad/Al) <sub>s</sub> | 0.5093         | 0.6083 | 0.6283 | 0.6026 | 2.4872 | 3.0427 | 0.3170 | 5.0809 | 0.7371 | 0.5860 | 1.3012  | 0.6653   | 0.6532   |

P = p-hydroxyl phenols; V = vanillyl phenols; S = syringyl phenols; C = cinnamyl phenols; (Ad/Al)<sub>v</sub> = ratio of vanillic acid to vanillin and (Ad/Al)<sub>s</sub> = ratio of syringic acid to syringaldehyde.

## Supplementary Material (ESI) for Journal of Environmental Monitoring

This journal is © The Royal Society of Chemistry 2008

## (b) LC1

| Lignin parameters   | Sampling dates and sediment depths |        |             |        |        |        |        |        |        |        |        |        |         |          |          |        |
|---------------------|------------------------------------|--------|-------------|--------|--------|--------|--------|--------|--------|--------|--------|--------|---------|----------|----------|--------|
|                     | Creran head                        |        | LC1(8.1.02) | 6.2.02 | 7.3.02 | 7.5.02 | 4.6.02 |        | 2.7.02 | 1.8.02 | 2.9.02 |        | 30.9.02 | 14.11.02 | 12.12.02 |        |
|                     | 0-1cm                              | 9-10cm | 0-1cm       | 0-1cm  | 0-1cm  | 0-1cm  | 0-1cm  | 9-10cm | 0-1cm  | 0-1cm  | 0-1cm  | 9-10cm | 0-1cm   | 0-1cm    | 0-1cm    | 9-10cm |
| P (mg/g)            | 0.0128                             | 0.0067 | 0.0824      | 0.0767 | 0.0591 | 0.0169 | 0.0665 | 0.0688 | 0.0545 | 0.0802 | 0.0923 | 0.0520 | 0.0324  | 0.0855   | 0.0722   | 0.0721 |
| V (mg/g)            | 0.0269                             | 0.0185 | 0.0853      | 0.0643 | 0.0755 | 0.0145 | 0.1097 | 0.0808 | 0.0685 | 0.0948 | 0.1148 | 0.0758 | 0.0881  | 0.1568   | 0.1205   | 0.1401 |
| S (mg/g)            | 0.0086                             | 0.0048 | 0.0586      | 0.0642 | 0.0498 | 0.0094 | 0.0732 | 0.0529 | 0.0451 | 0.0377 | 0.0648 | 0.0465 | 0.0705  | 0.0901   | 0.0754   | 0.0836 |
| C (mg/g)            | 0.0329                             | 0.0204 | 0.0734      | 0.0549 | 0.0746 | 0.0045 | 0.0892 | 0.0810 | 0.0692 | 0.0641 | 0.0908 | 0.0729 | 0.0711  | 0.0785   | 0.0760   | 0.0926 |
| Total lignin (mg/g) | 0.0684                             | 0.0437 | 0.2173      | 0.1834 | 0.1999 | 0.0284 | 0.2721 | 0.2147 | 0.1828 | 0.1966 | 0.2704 | 0.1952 | 0.2297  | 0.3254   | 0.2719   | 0.3163 |
| S/V                 | 0.3197                             | 0.2595 | 0.6870      | 0.9984 | 0.6596 | 0.6483 | 0.6673 | 0.6547 | 0.6584 | 0.3977 | 0.5645 | 0.6135 | 0.8002  | 0.5746   | 0.6257   | 0.5967 |
| C/V                 | 1.2230                             | 1.1027 | 0.8605      | 0.8538 | 0.9881 | 0.3103 | 0.8131 | 1.0025 | 1.0102 | 0.6762 | 0.7909 | 0.9617 | 0.8070  | 0.5006   | 0.6307   | 0.6610 |
| (Ad/Al)v            | 0.5918                             | 0.4894 | 0.3919      | 0.7748 | 0.9355 | 0.5395 | 1.1571 | 0.9500 | 0.7689 | 0.3201 | 0.7195 | 0.8889 | 1.3470  | 1.1737   | 0.8185   | 0.8603 |
| (Ad/Al)s            | 0.6579                             | 1.4545 | 0.8549      | 0.3510 | 0.6239 | 0.6444 | 0.5659 | 0.6102 | 0.4679 | 2.9038 | 0.6188 | 0.6406 | 0.8934  | 0.7913   | 0.5863   | 0.5324 |

Supplementary Material (ESI) for Journal of Environmental Monitoring

This journal is © The Royal Society of Chemistry 2008

(c) LC0

| Lignin parameters    | Sampling dates and sediment depths |                |                |                  |                   |
|----------------------|------------------------------------|----------------|----------------|------------------|-------------------|
|                      | 8.1.02 (0-1cm)                     | 4.4.02 (0-1cm) | 4.6.02 (0-1cm) | 14.11.02 (0-1cm) | 14.11.02 (9-10cm) |
| P (mg/g)             | 0.0934                             | 0.1155         | 0.0716         | 0.0735           | 0.0729            |
| V (mg/g)             | 0.1282                             | 0.1696         | 0.1347         | 0.1427           | 0.1521            |
| S (mg/g)             | 0.0782                             | 0.1145         | 0.0930         | 0.0840           | 0.0887            |
| C (mg/g)             | 0.0913                             | 0.0830         | 0.1139         | 0.0928           | 0.0855            |
| Total lignin (mg/g)  | 0.2977                             | 0.3671         | 0.3416         | 0.3195           | 0.3263            |
| S/V                  | 0.6100                             | 0.6751         | 0.6904         | 0.5886           | 0.5832            |
| C/V                  | 0.7123                             | 0.4894         | 0.8456         | 0.6503           | 0.5621            |
| (Ad/Al) <sub>v</sub> | 0.8593                             | 1.3304         | 0.9269         | 0.8651           | 1.3551            |
| (Ad/Al) <sub>s</sub> | 0.6366                             | 0.9080         | 0.5345         | 0.5621           | 0.7481            |

(d) LC2

| Lignin parameters    | Sampling dates and sediment depths |                |                 |
|----------------------|------------------------------------|----------------|-----------------|
|                      | 4.4.02 (0-1cm)                     | 2.9.02 (0-1cm) | 2.9.02 (9-10cm) |
| P (mg/g)             | 0.0611                             | 0.0382         | 0.0517          |
| V (mg/g)             | 0.1193                             | 0.0566         | 0.0686          |
| S (mg/g)             | 0.0715                             | 0.0248         | 0.0298          |
| C (mg/g)             | 0.0481                             | 0.0390         | 0.0603          |
| Total lignin (mg/g)  | 0.2389                             | 0.1204         | 0.1687          |
| S/V                  | 0.5993                             | 0.4382         | 0.5802          |
| C/V                  | 0.4032                             | 0.6890         | 0.8790          |
| (Ad/Al) <sub>v</sub> | 1.3053                             | 0.7083         | 0.8780          |
| (Ad/Al) <sub>s</sub> | 0.8932                             | 1.0638         | 0.6595          |

(e) LC3

| Lignin parameters    | Sampling dates and sediment depths |                 |                  |
|----------------------|------------------------------------|-----------------|------------------|
|                      | 7.5.02 (0-1cm)                     | 30.9.02 (0-1cm) | 30.9.02 (9-10cm) |
| P (mg/g)             | 0.0154                             | 0.0306          | 0.0353           |
| V (mg/g)             | 0.0271                             | 0.0381          | 0.0256           |
| S (mg/g)             | 0.0105                             | 0.0225          | 0.0133           |
| C (mg/g)             | 0.0104                             | 0.0193          | 0.0377           |
| Total lignin (mg/g)  | 0.0480                             | 0.0799          | 0.0766           |
| S/V                  | 0.3875                             | 0.5906          | 0.5196           |
| C/V                  | 0.3838                             | 0.5066          | 1.4727           |
| (Ad/Al) <sub>v</sub> | 0.5526                             | 1.5758          | 1.4324           |
| (Ad/Al) <sub>s</sub> | 0.4909                             | 1.5000          | 0.5846           |

## (f) LC5

| Lignin parameters   | Sampling dates and sediment depths |                |                  |                   |
|---------------------|------------------------------------|----------------|------------------|-------------------|
|                     | 6.2.02 (0-1cm)                     | 2.7.02 (0-1cm) | 12.12.02 (0-1cm) | 12.12.02 (9-10cm) |
| P (mg/g)            | 0.0300                             | 0.0628         | 0.0450           | 0.0362            |
| V (mg/g)            | 0.0286                             | 0.0874         | 0.0481           | 0.0212            |
| S (mg/g)            | 0.0044                             | 0.0557         | 0.0238           | 0.0082            |
| C (mg/g)            | 0                                  | 0.0689         | 0.0353           | 0.0242            |
| Total lignin (mg/g) | 0.0330                             | 0.2120         | 0.1072           | 0.0536            |
| S/V                 | 0.1538                             | 0.6373         | 0.4948           | 0.3868            |
| C/V                 | 0                                  | 0.7883         | 0.7339           | 1.1415            |
| (Ad/Al)v            | 0                                  | 0.9903         | 0.5611           | 0.5077            |
| (Ad/Al)s            | 0.4194                             | 0.5000         | 0.5042           | 0.6757            |

## (g) LC6

| Lignin parameters   | Sampling dates and sediment depths |                |                 |                  |
|---------------------|------------------------------------|----------------|-----------------|------------------|
|                     | 21.3.02 (0-1cm)                    | 1.8.02 (0-1cm) | 30.9.02 (0-1cm) | 30.9.02 (9-10cm) |
| P (mg/g)            | 0.0147                             | 0.0137         | 0.0280          | 0.0145           |
| V (mg/g)            | 0.0188                             | 0.0203         | 0.0265          | 0.0155           |
| S (mg/g)            | 0.0111                             | 0.0062         | 0.0073          | 0.0064           |
| C (mg/g)            | 0.0069                             | 0.0260         | 0.0353          | 0.0075           |
| Total lignin (mg/g) | 0.0368                             | 0.0525         | 0.0691          | 0.0294           |
| S/V                 | 0.5904                             | 0.3054         | 0.2755          | 0.4129           |
| C/V                 | 0.3670                             | 1.2808         | 1.3321          | 0.4839           |
| (Ad/Al)v            | 1.1129                             | 0.6481         | 0.8235          | 0.9487           |
| (Ad/Al)s            | 0.5091                             | 0.8846         | 0.8750          | 1.4500           |

Note that the above concentrations are reported in the unit mg/g. The mean OC content of each location is 4.8% for LC0, 6.0% for the sediment trap samples, 4.0% for LC1, 3.1% for LC2, 1.8% for LC3, 2.3% for LC5 and 1.1% for LC6.
